# Supplementary material for: Uptake, distribution and radio-enhancement effects of gold nanoparticles in tumor microtissues
Source: Royal Society of Chemistry journal article supplement (doi:10.1039/d0na00256a), 2020-01-01
Supplement: d0na00256a1.pdf [file d0na00256a1.pdf]

## Supporting Information

### **Uptake, Distribution and Radio-enhancement Effects of Gold Nanoparticles in Tumor Microtissues**

Anna L. Neuer,<sup>a,b</sup> Lukas R.H. Gerken,<sup>a,b</sup> Kerda Keevend,<sup>a,b</sup> Alexander Gogos,<sup>a</sup> Inge K. Herrmann<sup>\*a,b</sup>

<sup>a</sup>Laboratory for Particles Biology Interactions, Swiss Federal Laboratories for Materials Science and Technology (Empa),  
Lerchenfeldstrasse 5, CH-9014, St. Gallen, Switzerland.

<sup>b</sup>Nanoparticle Systems Engineering Laboratory, Institute of Process Engineering, Department of Mechanical and Process  
Engineering, ETH Zurich, Sonneggstrasse 3, CH-8092 Zurich, Switzerland.

\*inge.herrmann@empa.ch; ingeh@ethz.ch; +41 (0)58 765 7153

---

Table S1: Physico-chemical characterization of the AuNP purchased from nanoComposix (values given by manufacturer excl. zeta potential measured according to a protocol by EU-NCL with 10% PBS).

|                              | 5 nm AuNP        | 50 nm AuNP       |
|------------------------------|------------------|------------------|
| <b>Diameter</b>              | 5±0.7 nm         | 52±0.7 nm        |
| <b>Hydrodynamic diameter</b> | NA               | 62 nm            |
| <b>Zeta potential</b>        | -43.2±0.8        | -41.6±0.9        |
| <b>Particle surface</b>      | Sodium citrate   | Sodium citrate   |
| <b>Dispersant</b>            | H <sub>2</sub> O | H <sub>2</sub> O |

Table S2: AuNP uptake assessed by ICP-MS in 2D and 3D for mono- and co-cultured MT as well as both AuNP administration routes. Values represent the mean of 3 replicates. Number concentrations were calculated from the determined mass concentrations assuming a gold density of 19.3 g cm<sup>-3</sup> (representative of n=2).

|                         |                                                                  |                                                           |
|-------------------------|------------------------------------------------------------------|-----------------------------------------------------------|
| <b>2D</b>               |                                                                  |                                                           |
| <b>5 nm AuNP</b>        | 0.144 ng/cell<br>8<br>1.15*10 <sup>8</sup> NP/cell               |                                                           |
| <b>50 nm AuNP</b>       | 5.77 ng/cell<br>6<br>4.58*10 <sup>6</sup> NP/cell                |                                                           |
| <b>3D Mono-Cultured</b> | <b>Pre Formation</b>                                             | <b>Post Formation</b>                                     |
| <b>5 nm AuNP</b>        | 0.028±0.0002 ng/cell<br>6<br>(22.33±0.2)*10 <sup>6</sup> NP/cell | 0.011±0.003 ng/cell<br>6<br>8.83*10 <sup>6</sup> NP/cell  |
| <b>50 nm AuNP</b>       | 0.984±0.020 ng/cell<br>6<br>(0.78±0.02)*10 <sup>6</sup> NP/cell  | 0.087±0.027 ng/cell<br>6<br>0.07*10 <sup>6</sup> NP/cell  |
| <b>3D Co-Cultured</b>   | <b>Pre Formation</b>                                             | <b>Post Formation</b>                                     |
| <b>5 nm AuNP</b>        | 0.034±0.004 ng/cell<br>6<br>(27.11±3.29)*10 <sup>6</sup> NP/cell | 0.009±0.0001 ng/cell<br>6<br>7.13*10 <sup>6</sup> NP/cell |
| <b>50 nm AuNP</b>       | 1.526±0.007 ng/cell<br>6<br>(1.21±0.59)*10 <sup>6</sup> NP/cell  | 0.028±0.016 ng/cell<br>6<br>0.02*10 <sup>6</sup> NP/cell  |

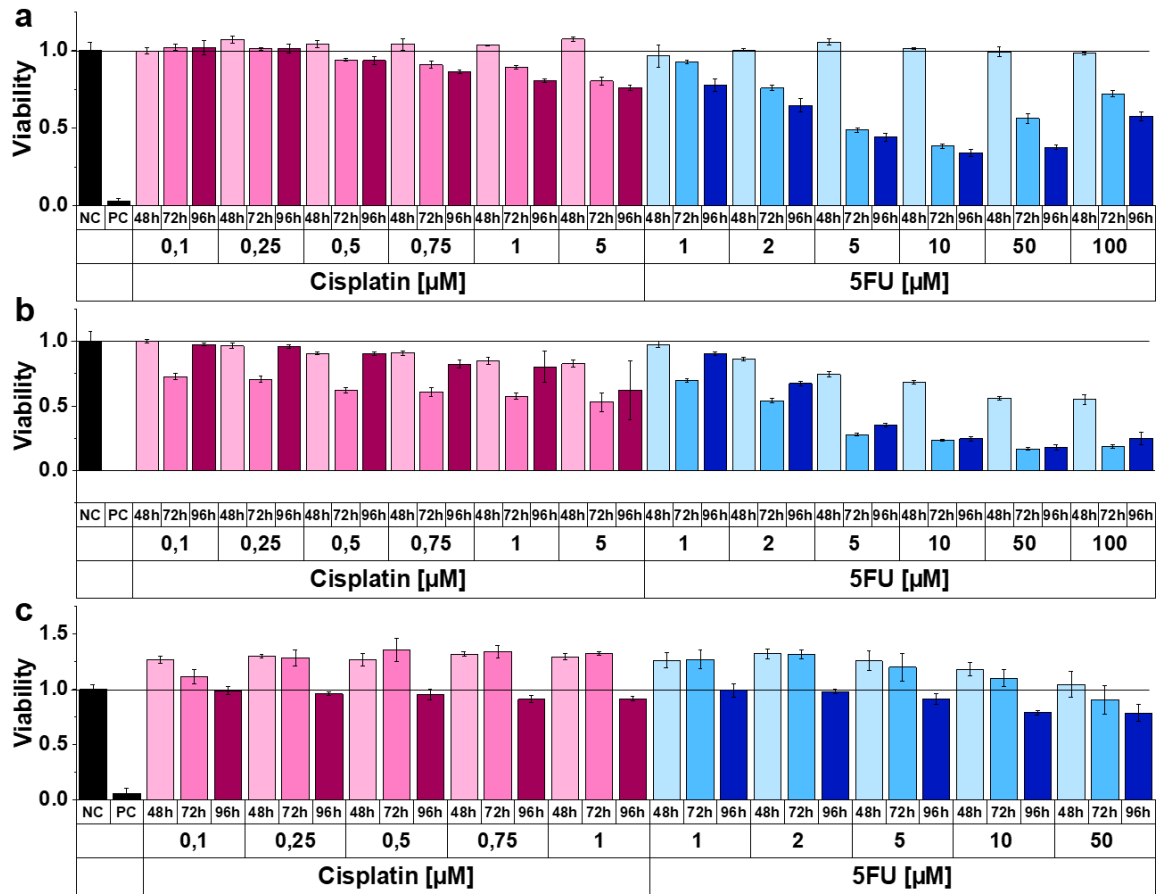

Figure S1: Cell viability of HeLa and NHDF cells in 2D and in 3D mono-cultured MT exposed to chemotherapeutic drugs cisplatin and 5FU as a function of applied dose and time. (a) 2D HeLa cells, (b) 2D NHDF cells and (c) 3D mono-cultured HeLa MT. All experiments n=3

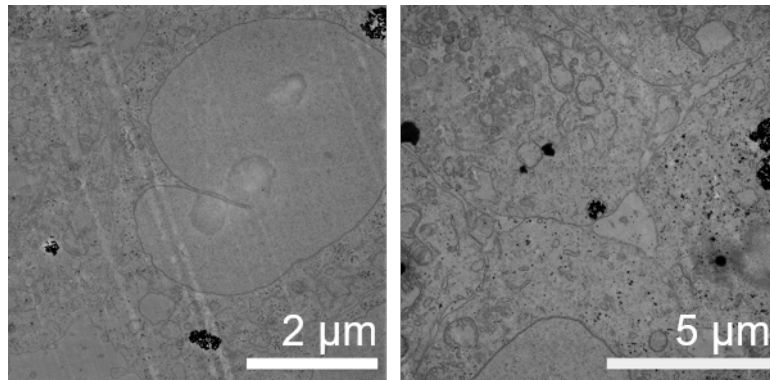

*Figures S2: Scanning transmission electron micrographs of 100 nm thin sections of mono-cultured HeLa MT containing 50 nm AuNP show agglomerates enclosed in membrane and non-membrane-bound vesicles.*

#### **Scanning transmission electron microscopy (STEM).**

For STEM, 8-10 MT per condition were pooled after fixation and stained with 2% osmium tetroxide for 1 hour at RT. Then, they were gradually dehydrated with increasing EtOH concentrations followed by epoxy resin (EPON 812, Sigma Aldrich) embedding according the manufacturer protocol. Resin blocks were cured at 60°C for 72h. Ultrathin sections of 100 nm thickness were prepared using an ultramicrotome Leica EM UC6 (Leica Mikrosysteme GmbH, Austria). STEM imaging was performed with a FEI Helios 660 G3 UC Focused Ion Beam (FIB)/SEM with STEM function.

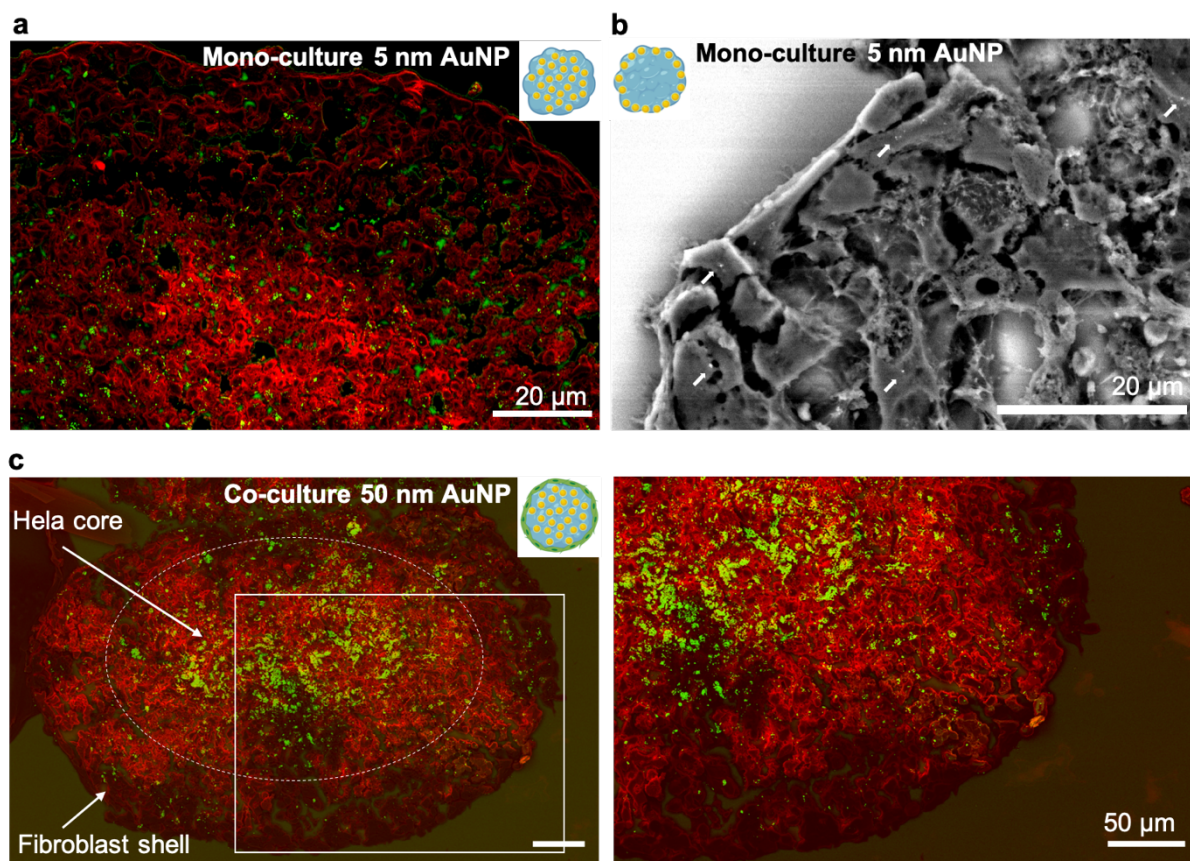

Figure S3: Intratissural distribution of AuNP. (a) DDC-SEM overview image showing the intratissural distribution of 5 nm AuNP in a histological section of mono-cultured HeLa MT (scale bar 20  $\mu\text{m}$ ). (b) BSE image of mono-cultured MT with 5 nm AuNP post-formation exposure with arrows pointing to NP. (c) DDC-SEM micrographs of co-cultured MT with HeLa core and NHDF shell where 50 nm AuNP were added to the HeLa cells prior to the MT formation (pre-formation, scale bars 50  $\mu\text{m}$ ).

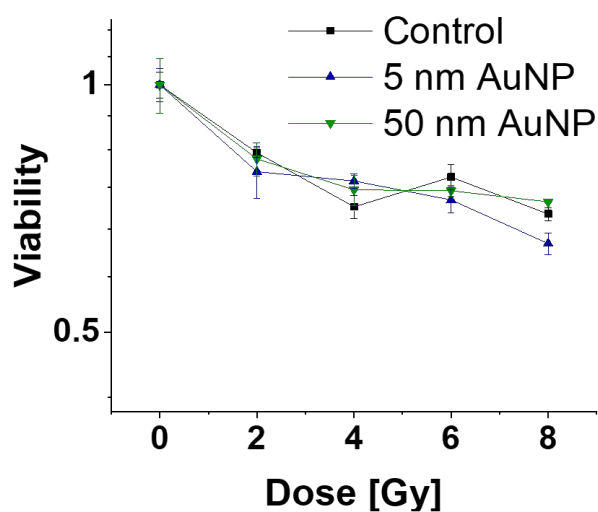

Figure S4: Survival fraction of 2D NHDF cell culture exposed to X-ray irradiation in presence or absence of AuNP ( $n=3$ ).
